# Supplementary material for: Experimental and predicted mechanical properties of Cr1−xAIxN thin films, at high temperatures, incorporating in situ synchrotron radiation X-ray diffraction and computational modelling
Source: Royal Society of Chemistry journal article supplement (doi:10.1039/c7ra00342k), 2017-01-01
Supplement: c7ra00342k1.pdf [file c7ra00342k1.pdf]

## Supplementary information

Table S1. *hkl* values for major phases in SR-XRD spectra as shown in Figures S1-S4.

| CrN (A) | $\sim 2\theta$ | Cr <sub>2</sub> N (B) | $\sim 2\theta$ | Cr (C) | $\sim 2\theta$ | AlN (D) | $\sim 2\theta$ |
|---------|----------------|-----------------------|----------------|--------|----------------|---------|----------------|
| (111)   | 19.7           | (110)                 | 19.5           | (111)  | 22.6           | (111)   | 20.2           |
| (002)   | 22.8           | (111)                 | 22.2           | (002)  | 26.2           | (002)   | 23.3           |
| (022)   | 32.5           | (112)                 | 28.9           | (022)  | 37.3           | (022)   | 33.2           |
| (311)   | 38.3           | (013)                 | 33.8           | (311)  | 44.1           | (311)   | 39.1           |
| (222)   | 40.1           | (031)                 | 35.8           | (222)  | 46.2           | (222)   | 41             |
| (004)   | 46.7           | (113)                 | 37.6           | (004)  | 53.8           | (004)   | 47.7           |
| (331)   | 51.1           |                       |                | (331)  | 59.1           |         |                |
| (042)   | 52.5           |                       |                | (042)  | 60.8           |         |                |
| (422)   | 58.0           |                       |                | (422)  | 67.4           |         |                |
| (333)   | 61.9           |                       |                |        |                |         |                |
| (044)   | 68.1           |                       |                |        |                |         |                |

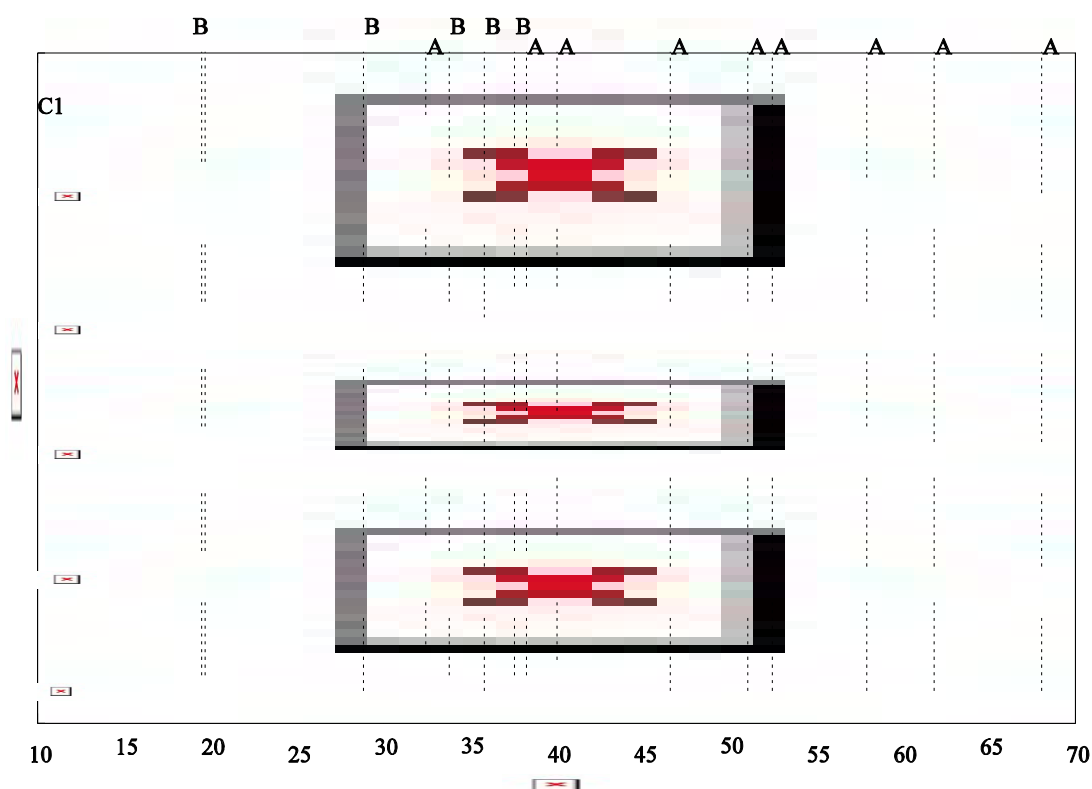

Figure S1. In-situ SR-XRD data for C1 coating heated from 25 to 700 °C in air

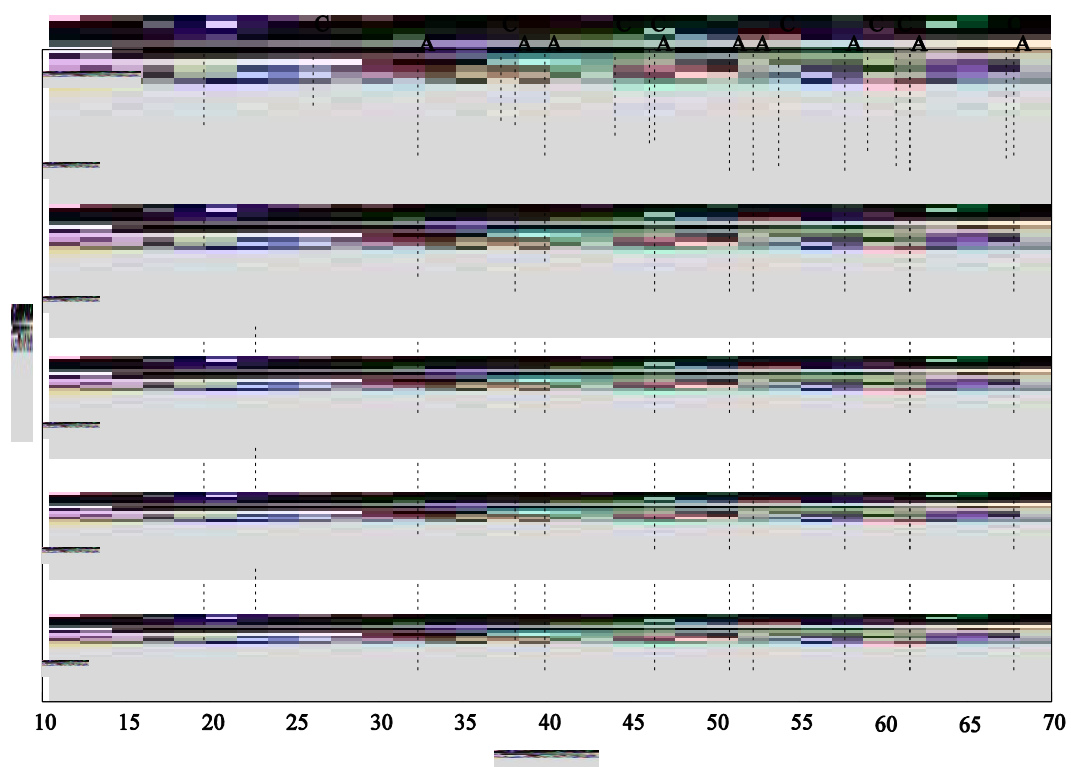

Figure S2. In-situ SR-XRD data for C2-14%Al coating heated from 25 to 700 °C in air

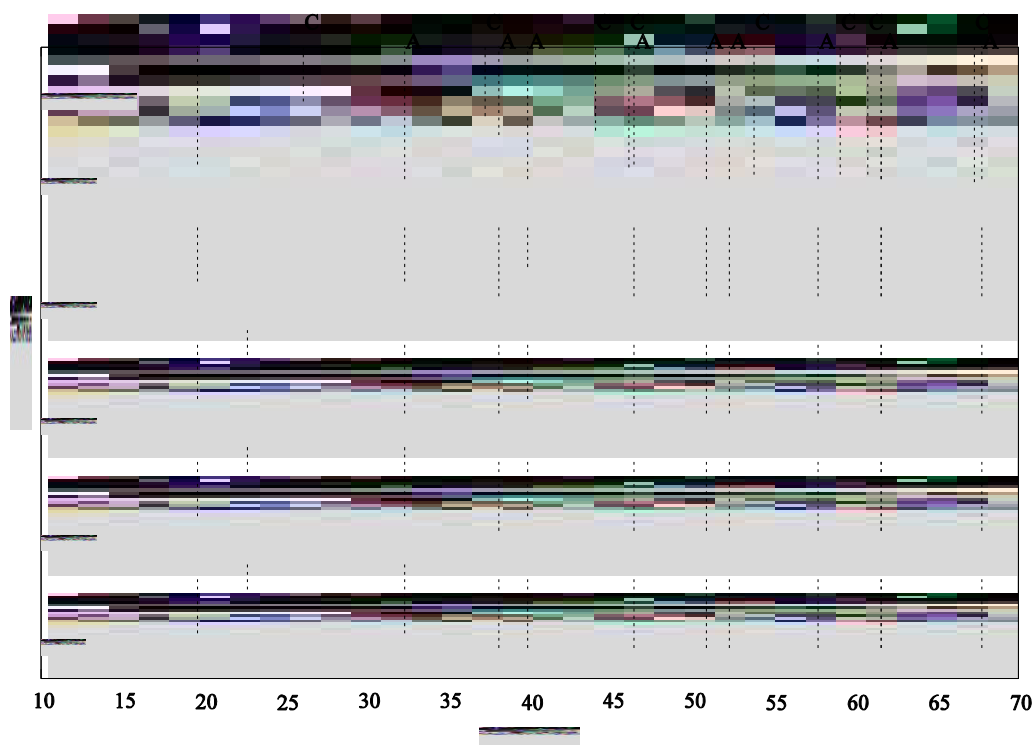

Figure S3. In-situ SR-XRD data for C3-17%Al coating heated from 25 to 700 °C in air

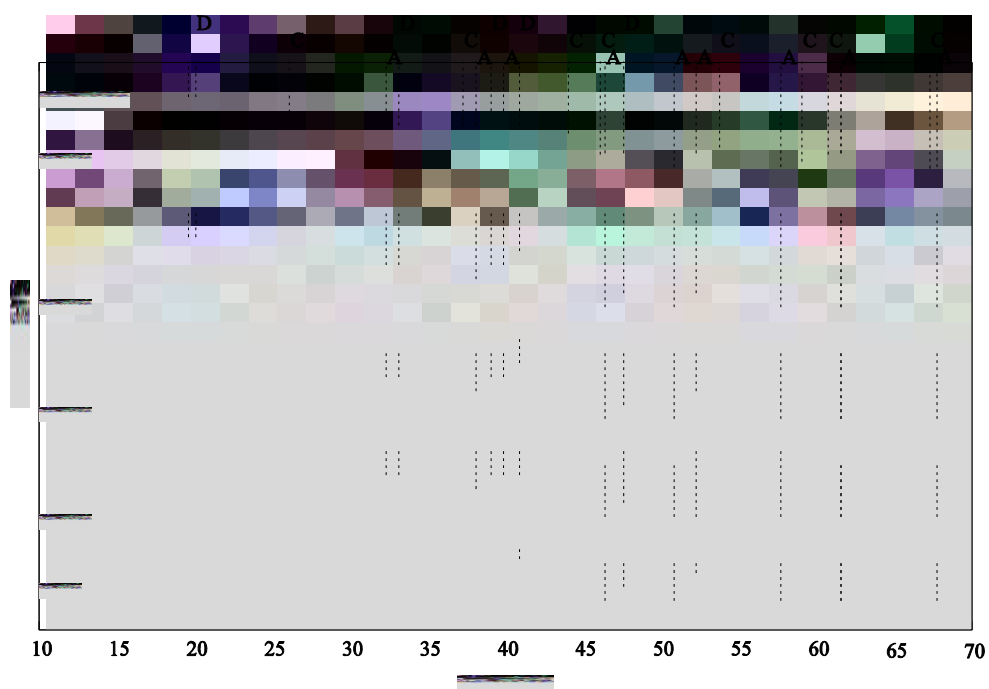

Figure S4. In-situ SR-XRD data for C4-21%Al coating heated from 25 to 700 °C in air

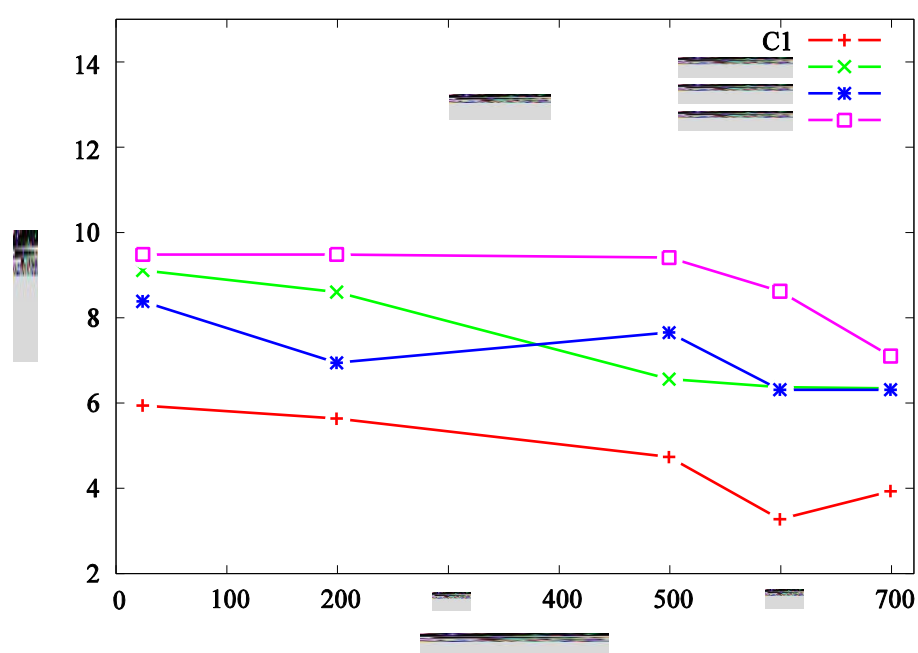

Figure S5. Stress in CrN structure for (111) orientations as function of temperature

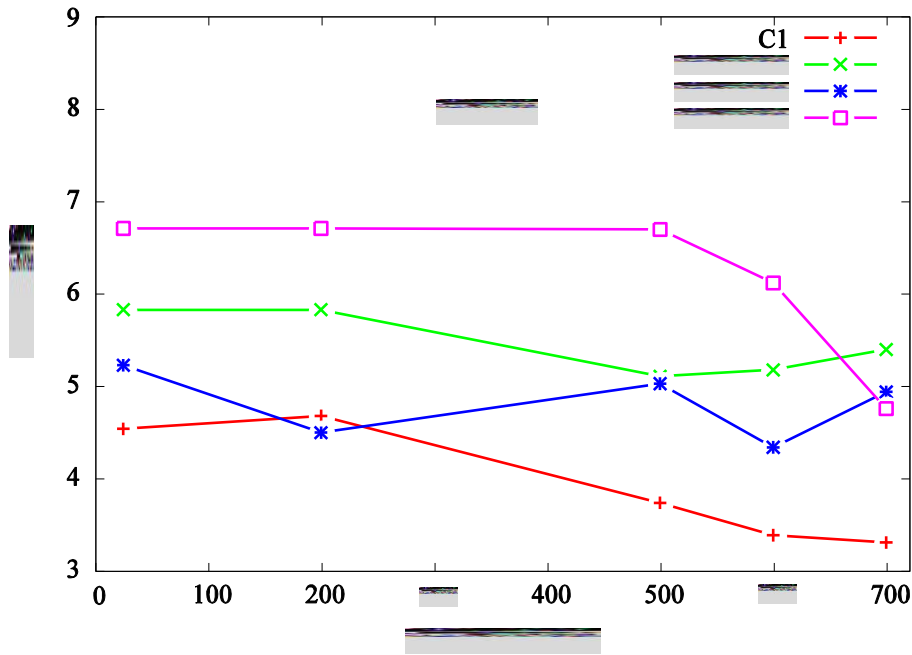

Figure S6. Stress in CrN structure for (200) orientations as function of temperature

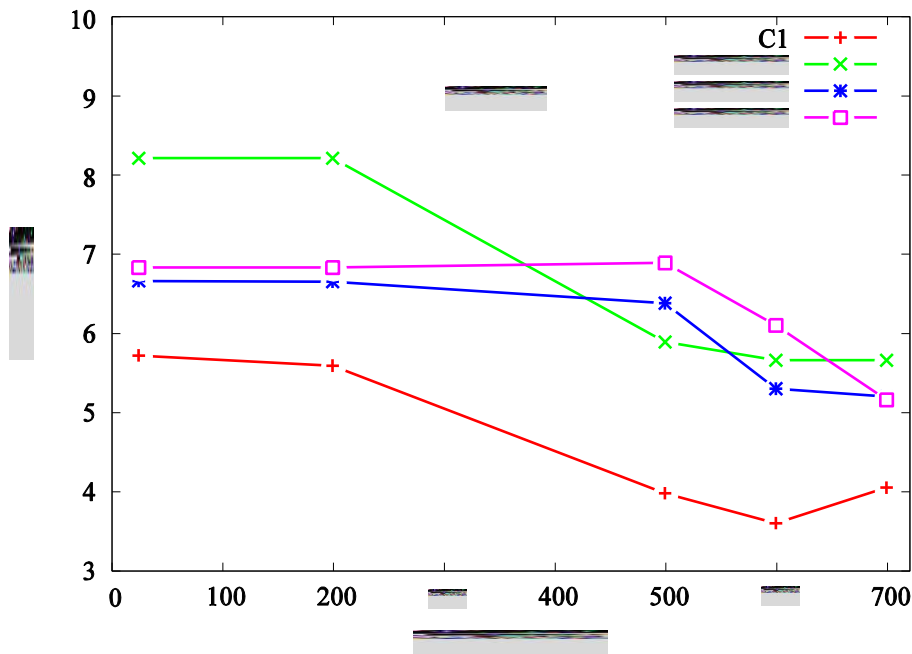

Figure S7. Stress in CrN structure for (311) orientations as function of temperature.

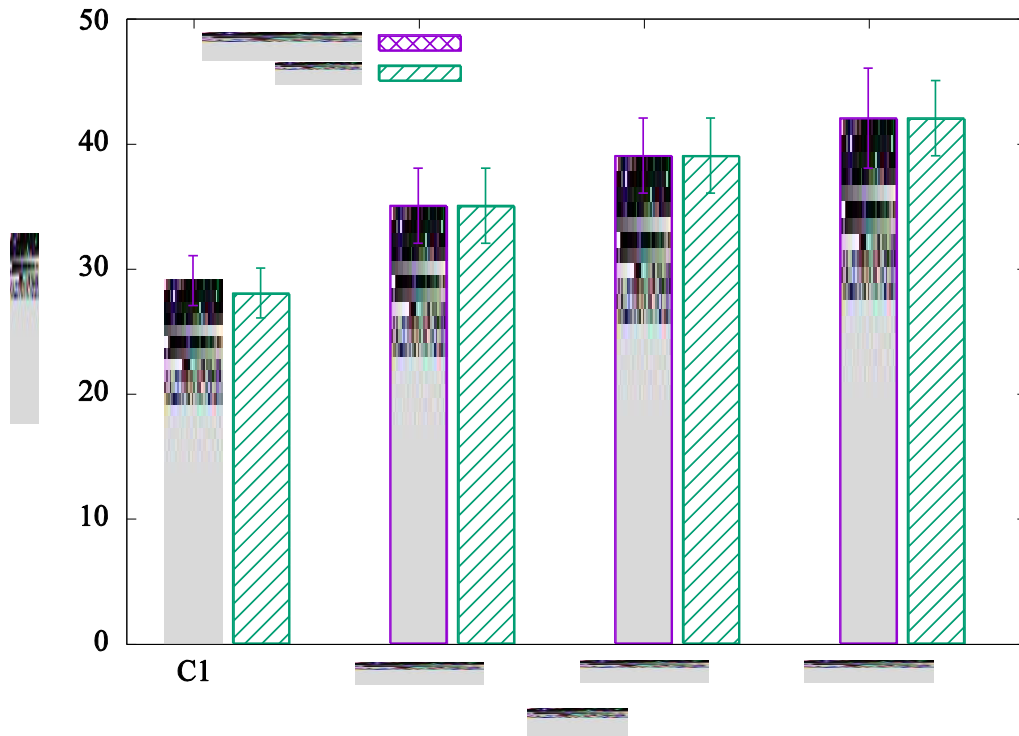

Figure S8. The Hardness ( $H$ ) measured at room temperature for as-deposited and heated samples.

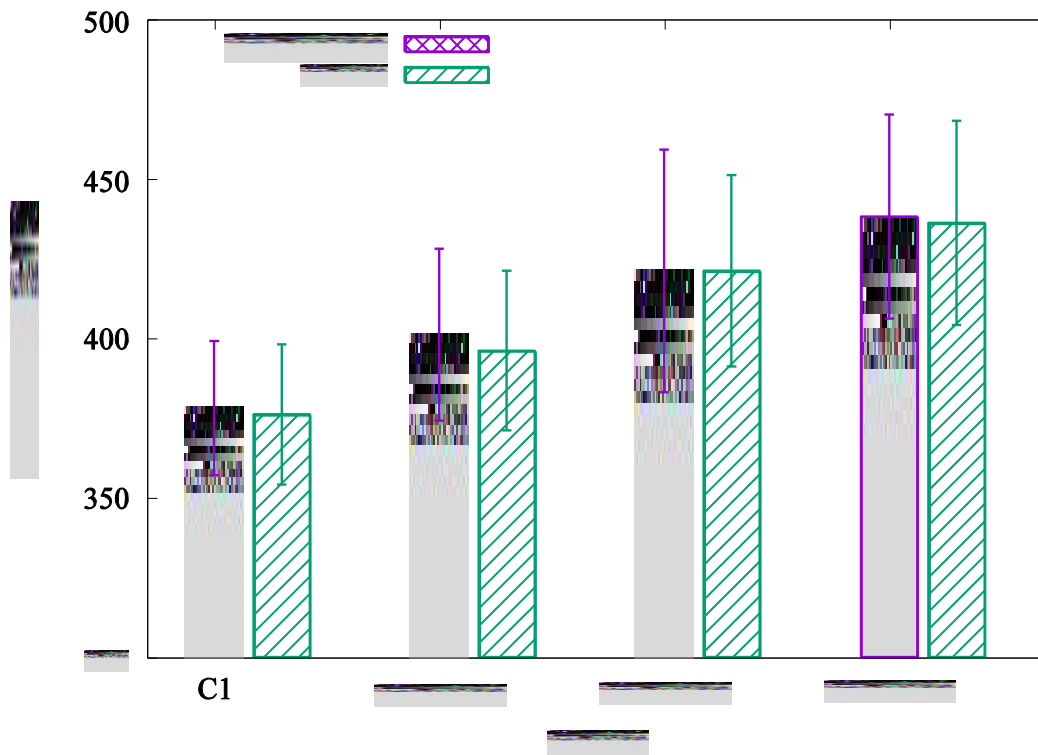

Figure S9. The Elastic modulus ( $E$ ) measured at room temperature for as-deposited and heated samples.

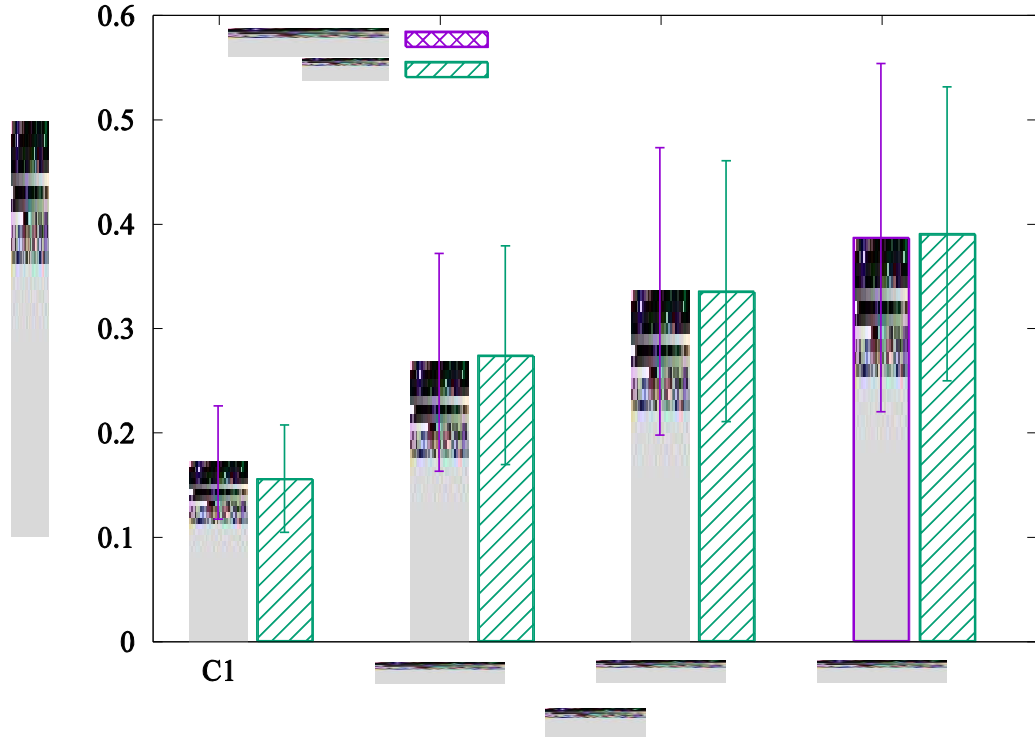

Figure S10. The resistance to deformation ( $H^3/E^2$ ) measured at room temperature for as-deposited and heated samples.

Table S2. k-points grids, used in the VASP simulation, for elastic constants of CrN-m.

|                       | Elastic constants |          |          |
|-----------------------|-------------------|----------|----------|
| k-points              | $C_{11}$          | $C_{12}$ | $C_{44}$ |
| $3 \times 3 \times 3$ | 514               | 201      | 118      |
| $9 \times 9 \times 9$ | 311               | 38       | 60.3     |
| $13 \times 13$        | 395               | 126      | 60.3     |
| $15 \times 15$        | 377               | 110      | 62.0     |
| $21 \times 21$        | 376               | 115      | 61.7     |

Table S3. k-points grids, used in the VASP simulation, for elastic constants of CrN-nm.

|                       | Elastic constants |          |          |
|-----------------------|-------------------|----------|----------|
| k-points              | $C_{11}$          | $C_{12}$ | $C_{44}$ |
| $5 \times 5 \times 5$ | 598               | 210      | 23.8     |
| $9 \times 9 \times 9$ | 519               | 249      | 3.7      |
| $13 \times 13 \times$ | 582               | 217      | 4.3      |
| $15 \times 15$        | 582               | 218      | 5.7      |
| $21 \times 21$        | 590               | 215      | 6.7      |
| $25 \times 25$        | 589               | 215.     | 6.1      |
| $31 \times 31 \times$ | 588               | 215      | 5.9      |
